# Supplementary material
Source: Springer Nature journal article supplement (https://www.springermedizin.de/resource/supplementary/12885_2009_2471_MOESM5_ESM.pdf/9461388)

**A**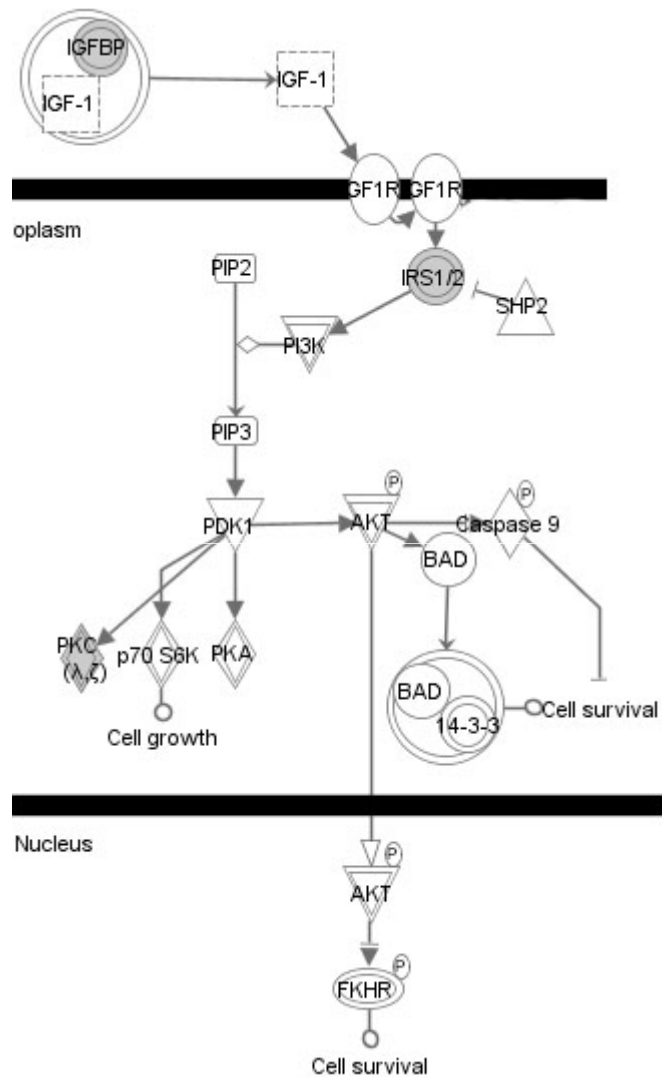**B**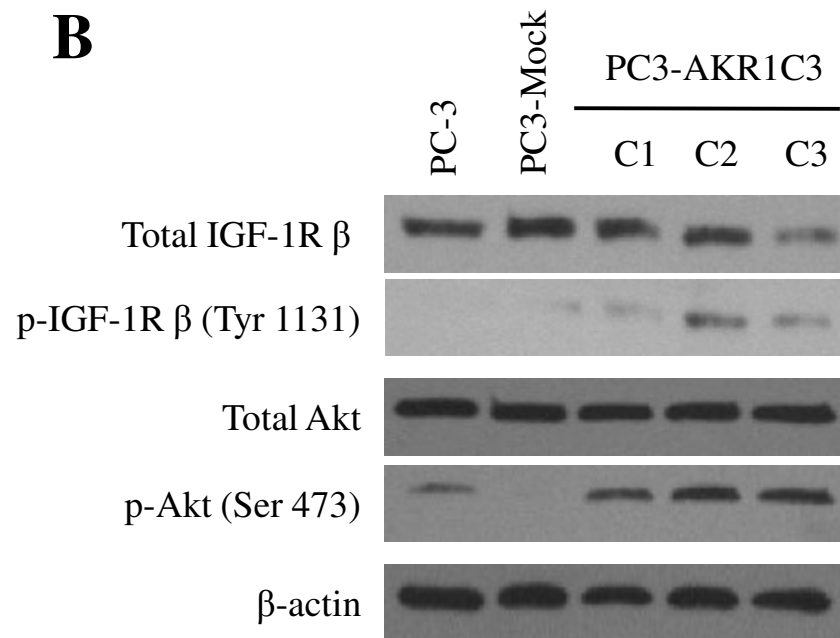

Supplement: MOESM5 [file 9461388]
